# Supplementary material
Source: PubMed Central journal article supplement (PMC8223625)
Supplement: jnnp-2020-325549supp001.pdf [file jnnp-2020-325549supp001.pdf]

## Supplementary Material

**eTable 1.** Regional rotated weights of the seven significant MRI principal components (PC) identified by principal component analysis on grey-matter regional volumes.

| <i>Regions</i>                                   | <b>PC1</b>  | <b>PC2</b>  | <b>PC3</b>  | <b>PC4</b>  | <b>PC5</b>  | <b>PC6</b>  | <b>PC7</b>  |
|--------------------------------------------------|-------------|-------------|-------------|-------------|-------------|-------------|-------------|
| <i>Postcentral_gyrus</i>                         | 0.871       | 0.101       | 0.115       | -0.227      | 0.151       | 0.132       | -0.003      |
| <i>Superior_parietal_gyrus</i>                   | 0.769       | 0.082       | 0.077       | 0.167       | 0.037       | -0.038      | 0.290       |
| <i>Lateral_remainder_of_occipital_lobe</i>       | 0.742       | -0.085      | 0.449       | 0.020       | 0.111       | 0.140       | 0.135       |
| <i>Anterior_temporal_lobe_medial_part</i>        | -0.710      | 0.118       | 0.488       | 0.128       | 0.177       | -0.127      | -0.100      |
| <i>Medial_orbital_gyrus</i>                      | 0.693       | 0.208       | 0.499       | 0.148       | 0.294       | -0.175      | 0.202       |
| <i>Superior_frontal_gyrus</i>                    | 0.672       | 0.039       | 0.114       | 0.234       | 0.616       | 0.226       | 0.018       |
| <i>Thalamus</i>                                  | 0.646       | 0.391       | 0.116       | 0.165       | -0.309      | 0.140       | -0.377      |
| <i>Cuneus</i>                                    | 0.633       | -0.037      | 0.294       | -0.072      | 0.268       | -0.296      | -0.054      |
| <i>Gyrus_cinguli_posterior_part</i>              | 0.598       | 0.254       | 0.004       | -0.164      | -0.076      | -0.126      | 0.358       |
| <i>Caudate_nucleus</i>                           | 0.588       | 0.293       | 0.256       | -0.100      | 0.214       | 0.383       | 0.004       |
| <i>Inferior_frontal_gyrus</i>                    | 0.546       | 0.434       | 0.225       | 0.017       | 0.041       | 0.254       | 0.536       |
| <i>Cerebellum_dentate</i>                        | 0.205       | 0.894       | -0.037      | -0.071      | 0.080       | -0.054      | -0.020      |
| <i>Nucleus_accumbens</i>                         | 0.029       | 0.814       | 0.075       | 0.016       | 0.181       | 0.032       | 0.000       |
| <i>Amygdala</i>                                  | -0.421      | 0.790       | 0.262       | 0.261       | 0.051       | -0.037      | -0.029      |
| <i>Brainstem_mid</i>                             | 0.104       | 0.656       | 0.082       | 0.491       | -0.052      | 0.203       | 0.099       |
| <i>Substantia_nigra</i>                          | 0.311       | 0.653       | 0.003       | 0.505       | -0.151      | -0.034      | 0.114       |
| <i>Putamen</i>                                   | 0.513       | 0.638       | 0.062       | 0.053       | -0.078      | 0.382       | 0.043       |
| <i>Hippocampus</i>                               | -0.002      | 0.610       | -0.004      | 0.149       | 0.503       | 0.482       | -0.088      |
| <i>Precentral_gyrus</i>                          | 0.526       | 0.608       | 0.110       | 0.051       | 0.238       | -0.162      | 0.223       |
| <i>Cerebellum_gm</i>                             | 0.319       | 0.607       | 0.288       | 0.071       | 0.249       | 0.217       | -0.015      |
| <i>Posterior_orbital_gyrus</i>                   | 0.075       | 0.152       | 0.872       | 0.033       | -0.052      | 0.100       | 0.324       |
| <i>Anterior_orbital_gyrus</i>                    | 0.289       | 0.300       | 0.710       | 0.305       | 0.392       | 0.144       | -0.037      |
| <i>Lingual_gyrus</i>                             | 0.574       | -0.048      | 0.660       | 0.048       | 0.020       | 0.176       | 0.022       |
| <i>Anterior_temporal_lobe_lateral_part</i>       | 0.124       | 0.063       | 0.605       | 0.062       | -0.029      | 0.233       | -0.063      |
| <i>Brainstem_pon</i>                             | -0.255      | 0.505       | -0.573      | -0.204      | 0.045       | 0.163       | 0.329       |
| <i>Superior_temporal_gyrus_posterior_part</i>    | -0.084      | 0.272       | 0.207       | 0.802       | 0.221       | 0.107       | -0.027      |
| <i>Fusiform_gyrus</i>                            | -0.279      | -0.055      | -0.136      | 0.783       | -0.056      | -0.225      | 0.088       |
| <i>Middle_and_inferior_temporal_gyrus</i>        | 0.155       | 0.112       | 0.460       | 0.628       | 0.253       | 0.139       | -0.027      |
| <i>Insula</i>                                    | 0.174       | 0.120       | 0.450       | 0.558       | 0.046       | -0.075      | 0.269       |
| <i>Parahippocampal_and_ambient_gyri</i>          | 0.065       | 0.099       | -0.008      | 0.098       | 0.960       | -0.050      | -0.052      |
| <i>Subcallosal_area</i>                          | 0.132       | 0.204       | 0.209       | -0.026      | 0.761       | 0.079       | 0.070       |
| <i>Brainstem_med</i>                             | 0.140       | 0.034       | -0.102      | -0.037      | -0.013      | 0.939       | 0.107       |
| <i>Lateral_orbital_gyrus</i>                     | 0.057       | 0.118       | 0.334       | -0.024      | 0.055       | 0.757       | -0.049      |
| <i>Presubgenual_frontal_cortex</i>               | 0.124       | -0.041      | 0.256       | 0.368       | 0.125       | 0.545       | 0.470       |
| <i>Superior_temporal_gyrus_anterior_part</i>     | -0.201      | -0.002      | 0.062       | 0.097       | 0.061       | 0.005       | -0.839      |
| <i>Subgenual_frontal_cortex</i>                  | -0.231      | -0.051      | 0.301       | 0.316       | 0.072       | 0.301       | 0.671       |
| <i>Inferiolateral_remainder_of_parietal_lobe</i> | 0.401       | 0.042       | 0.323       | 0.350       | -0.149      | -0.171      | 0.616       |
| <i>Cerebellum_wm</i>                             | 0.078       | 0.197       | 0.072       | -0.148      | 0.234       | 0.061       | -0.142      |
| <i>Cingulate_gyrus_anterior_part</i>             | 0.164       | 0.291       | -0.031      | 0.004       | -0.279      | 0.124       | 0.250       |
| <i>Straight_gyrus</i>                            | 0.085       | -0.062      | -0.065      | 0.080       | 0.101       | -0.039      | 0.085       |
| <i>Middle_frontal_gyrus</i>                      | 0.319       | 0.338       | 0.427       | 0.122       | 0.176       | -0.278      | 0.142       |
| <i>Pallidum</i>                                  | -0.030      | 0.374       | -0.149      | -0.034      | 0.216       | 0.031       | 0.170       |
| <i>Posterior_temporal_lobe</i>                   | 0.324       | 0.151       | 0.166       | 0.175       | 0.077       | 0.121       | 0.397       |
| <b>Cumulative % of Variance</b>                  | <b>32.0</b> | <b>43.8</b> | <b>53.8</b> | <b>61.6</b> | <b>68.8</b> | <b>75.2</b> | <b>80.8</b> |

**eTable 2.** Regional rotated weights of the four significant [<sup>11</sup>C]PK11195 PET principal components (PC) identified by principal component analysis on non-displaceable binding potential regional values.

| <b>Regions</b>                                   | <b>PC 1</b> | <b>PC 2</b> | <b>PC 3</b> | <b>PC 4</b> |
|--------------------------------------------------|-------------|-------------|-------------|-------------|
| <i>Lingual_gyrus</i>                             | 0.903       | 0.297       | 0.145       | 0.127       |
| <i>Cerebellum_gm</i>                             | 0.900       | 0.173       | -0.034      | 0.156       |
| <i>Anterior_orbital_gyrus</i>                    | 0.897       | 0.104       | 0.288       | 0.184       |
| <i>Cuneus</i>                                    | 0.892       | 0.232       | 0.132       | 0.157       |
| <i>Medial_orbital_gyrus</i>                      | 0.869       | 0.233       | 0.196       | 0.269       |
| <i>Straight_gyrus</i>                            | 0.861       | 0.370       | 0.066       | 0.169       |
| <i>Lateral_orbital_gyrus</i>                     | 0.827       | 0.351       | 0.019       | 0.295       |
| <i>Thalamus</i>                                  | 0.820       | 0.124       | 0.203       | 0.294       |
| <i>Gyrus_cinguli_posterior_part</i>              | 0.816       | 0.299       | 0.017       | 0.165       |
| <i>Caudate_nucleus</i>                           | 0.814       | 0.086       | 0.069       | -0.002      |
| <i>Presubgenual_frontal_cortex</i>               | 0.786       | 0.161       | 0.211       | 0.355       |
| <i>Inferior_frontal_gyrus</i>                    | 0.779       | 0.273       | 0.059       | 0.447       |
| <i>Middle_and_inferior_temporal_gyrus</i>        | 0.774       | 0.495       | 0.206       | 0.277       |
| <i>Lateral_remainder_of_occipital_lobe</i>       | 0.762       | 0.437       | 0.287       | 0.190       |
| <i>Fusiform_gyrus</i>                            | 0.758       | 0.371       | 0.260       | -0.076      |
| <i>Anterior_temporal_lobe_lateral_part</i>       | 0.745       | 0.547       | 0.147       | 0.126       |
| <i>Posterior_orbital_gyrus</i>                   | 0.740       | 0.490       | 0.223       | 0.205       |
| <i>Posterior_temporal_lobe</i>                   | 0.723       | 0.522       | 0.287       | 0.304       |
| <i>Subgenual_frontal_cortex</i>                  | 0.691       | 0.363       | 0.350       | 0.279       |
| <i>Superior_temporal_gyrus_posterior_part</i>    | 0.687       | 0.398       | 0.187       | 0.423       |
| <i>Inferiolateral_remainder_of_parietal_lobe</i> | 0.674       | 0.499       | 0.117       | 0.391       |
| <i>Superior_parietal_gyrus</i>                   | 0.610       | 0.464       | 0.112       | 0.291       |
| <i>Insula</i>                                    | 0.586       | 0.560       | 0.362       | 0.253       |
| <i>Cingulate_gyrus_anterior_part</i>             | 0.579       | 0.413       | -0.127      | 0.318       |
| <i>Subcallosal_area</i>                          | 0.567       | 0.555       | -0.025      | -0.086      |
| <i>Anterior_temporal_lobe_medial_part</i>        | 0.475       | 0.798       | 0.051       | 0.025       |
| <i>Hippocampus</i>                               | 0.235       | 0.794       | 0.311       | 0.170       |
| <i>Amygdala</i>                                  | 0.238       | 0.789       | 0.351       | 0.202       |
| <i>Superior_temporal_gyrus_anterior_part</i>     | 0.645       | 0.670       | -0.011      | 0.145       |
| <i>Parahippocampal_and_ambient_gyri</i>          | 0.513       | 0.668       | 0.225       | 0.279       |
| <i>Nucleus_accumbens</i>                         | 0.443       | 0.567       | -0.237      | 0.166       |
| <i>Brainstem_pon</i>                             | 0.304       | 0.129       | 0.876       | 0.061       |
| <i>Cerebellum_dentate</i>                        | 0.067       | -0.030      | 0.847       | 0.198       |
| <i>Cerebellum_wm</i>                             | 0.089       | 0.365       | 0.797       | -0.015      |
| <i>Brainstem_mid</i>                             | 0.436       | 0.233       | 0.608       | 0.390       |
| <i>Superior_frontal_gyrus</i>                    | 0.426       | 0.012       | -0.004      | 0.792       |
| <i>Middle_frontal_gyrus</i>                      | 0.298       | 0.285       | 0.359       | 0.778       |
| <i>Precentral_gyrus</i>                          | 0.205       | 0.315       | 0.451       | 0.634       |
| <i>Postcentral_gyrus</i>                         | 0.402       | 0.455       | 0.115       | 0.622       |
| <i>Substantia_nigra</i>                          | -0.051      | 0.113       | 0.074       | 0.026       |
| <i>Brainstem_med</i>                             | 0.386       | 0.234       | 0.331       | -0.026      |
| <i>Putamen</i>                                   | 0.620       | 0.099       | 0.008       | 0.043       |
| <i>Pallidum</i>                                  | -0.030      | 0.138       | 0.473       | 0.120       |
| <b>Cumulative % of Variance</b>                  | <b>62.8</b> | <b>72.0</b> | <b>77.1</b> | <b>81.4</b> |

**eTable 3.** Regional rotated weights of the four significant [<sup>18</sup>F]AV-1451 PET principal components (PC) identified by principal component analysis on non-displaceable binding potential regional values.

| <b>Regions</b>                                   | <b>PC 1</b> | <b>PC 2</b> | <b>PC 3</b> | <b>PC 4</b> |
|--------------------------------------------------|-------------|-------------|-------------|-------------|
| <i>Middle_frontal_gyrus</i>                      | 0.891       | 0.278       | 0.177       | 0.210       |
| <i>Postcentral_gyrus</i>                         | 0.791       | 0.465       | 0.231       | 0.159       |
| <i>Precentral_gyrus</i>                          | 0.769       | 0.355       | 0.073       | 0.392       |
| <i>Superior_frontal_gyrus</i>                    | 0.766       | 0.241       | 0.382       | 0.225       |
| <i>Lateral_orbital_gyrus</i>                     | 0.731       | 0.437       | 0.200       | 0.174       |
| <i>Inferior_frontal_gyrus</i>                    | 0.711       | 0.305       | 0.384       | 0.410       |
| <i>Inferiolateral_remainder_of_parietal_lobe</i> | 0.706       | 0.620       | 0.173       | 0.202       |
| <i>Superior_parietal_gyrus</i>                   | 0.704       | 0.567       | 0.077       | 0.029       |
| <i>Middle_inferior_temporal_gyrus</i>            | 0.656       | 0.511       | 0.078       | 0.388       |
| <i>Lateral_remainder_of_occipital_lobe</i>       | 0.645       | 0.550       | 0.193       | 0.330       |
| <i>Medial_orbital_gyrus</i>                      | 0.584       | 0.107       | 0.572       | 0.415       |
| <i>Superior_temporal_gyrus_posterior_part</i>    | 0.577       | 0.380       | 0.545       | 0.301       |
| <i>Anterior_orbital_gyrus</i>                    | 0.533       | 0.106       | 0.517       | 0.497       |
| <i>Amygdala</i>                                  | 0.240       | 0.878       | 0.283       | 0.131       |
| <i>Hippocampus</i>                               | 0.281       | 0.825       | -0.016      | 0.341       |
| <i>Parahippocampal_and_ambient_gyri</i>          | 0.410       | 0.767       | 0.326       | -0.038      |
| <i>Anterior_temporal_lobe_medial_part</i>        | 0.307       | 0.758       | 0.422       | -0.045      |
| <i>Fusiform_gyrus</i>                            | 0.355       | 0.752       | 0.178       | 0.064       |
| <i>Brainstem_med</i>                             | 0.086       | 0.736       | 0.133       | 0.299       |
| <i>Anterior_temporal_lobe_lateral_part</i>       | 0.449       | 0.682       | 0.301       | 0.188       |
| <i>Posterior_temporal_lobe</i>                   | 0.559       | 0.668       | 0.200       | 0.358       |
| <i>Posterior_orbital_gyrus</i>                   | 0.565       | 0.636       | 0.344       | 0.269       |
| <i>Insula</i>                                    | 0.540       | 0.554       | 0.225       | 0.457       |
| <i>Cingulate_gyrus_anterior_part</i>             | 0.464       | 0.551       | 0.511       | -0.074      |
| <i>Subcallosal_area</i>                          | -0.206      | 0.189       | 0.840       | -0.029      |
| <i>Superior_temporal_gyrus_anterior_part</i>     | 0.396       | 0.334       | 0.794       | 0.164       |
| <i>Subgenual_frontal_cortex</i>                  | 0.313       | 0.236       | 0.785       | 0.289       |
| <i>Straight_gyrus</i>                            | 0.344       | 0.400       | 0.732       | 0.081       |
| <i>Presubgenual_frontal_cortex</i>               | 0.418       | 0.086       | 0.700       | 0.318       |
| <i>Cerebellum_dentate</i>                        | 0.003       | -0.007      | 0.193       | 0.907       |
| <i>Brainstem_mid</i>                             | 0.221       | 0.227       | 0.136       | 0.872       |
| <i>Cerebellum_wm</i>                             | 0.524       | 0.121       | -0.081      | 0.770       |
| <i>Thalamus</i>                                  | 0.395       | 0.229       | 0.285       | 0.726       |
| <i>Brainstem_pon</i>                             | 0.262       | 0.519       | 0.193       | 0.679       |
| <i>Substantia_nigra</i>                          | 0.457       | 0.274       | 0.099       | 0.547       |
| <i>Putamen</i>                                   | 0.223       | 0.296       | -0.011      | 0.296       |
| <i>Caudate_nucleus</i>                           | 0.084       | 0.061       | 0.553       | 0.301       |
| <i>Nucleusaccumbens</i>                          | 0.389       | 0.402       | 0.255       | 0.066       |
| <i>Lingual_gyrus</i>                             | 0.246       | 0.419       | 0.477       | 0.210       |
| <i>Pallidum</i>                                  | 0.274       | 0.133       | 0.227       | 0.473       |
| <i>Cuneus</i>                                    | 0.321       | 0.482       | 0.376       | 0.279       |
| <i>Gyrus_cinguli_posterior_part</i>              | 0.504       | 0.450       | 0.453       | 0.116       |
| <i>Cerebellum_gm</i>                             | -0.038      | 0.032       | 0.009       | 0.135       |
| <b>Cumulative % of Variance</b>                  | <b>61.3</b> | <b>69.9</b> | <b>76.9</b> | <b>81.8</b> |
